# Supplementary material
Source: PubMed Central journal article supplement (PMC3770323)

# SI Figure 1

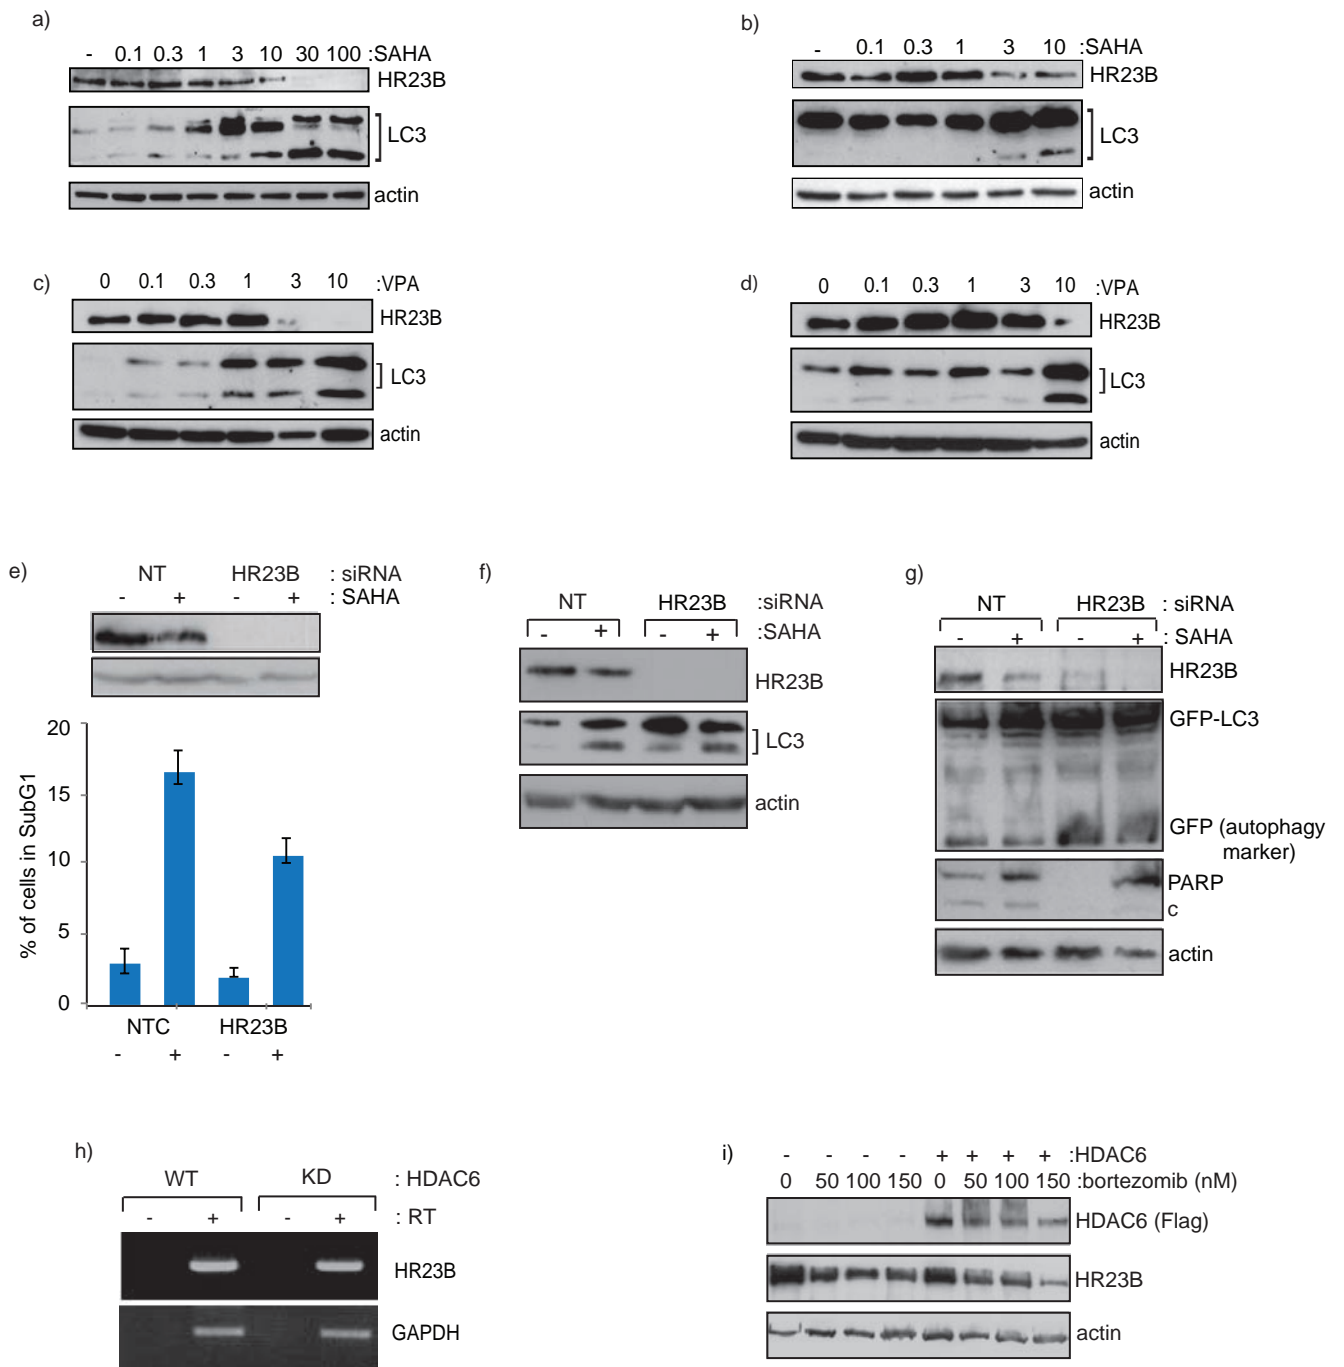

Supplement: cdd201347x1.pdf [file cdd201347x1.pdf]
